# Supplementary material
Source: HighWire-hosted journal article supplement (https://jitc.bmj.com/content/5/1/30)
Supplement: media-2 [file media-2.pdf]

|                                           | Very active | Active     | Sedentary  |
|-------------------------------------------|-------------|------------|------------|
| Total EE (avg kj)                         | 13529±2272  | 12690±3560 | 11248±2420 |
| Active EE >3.0MET (avg kj)                | 4059±1193   | 3750±2758  | 2093±979   |
| Avg # of steps                            | 10844±3341  | 8964±3958  | 7815±2412  |
| Length of regular exercise (years)        | 12.3±9.5    | 7.8±5.8    | N/A        |
| Total aerobic exercise (mins per week)    | 336±176     | 648±498    | N/A        |
| Total run/cycle (mins per week)           | 270±157     | 291±232    | N/A        |
| Total resistance exercise (mins per week) | 165±114     | 156±88     | N/A        |

**Additional File 2..** Activity data for participants from the Body Media device and questionnaires.
